# Supplementary material
Source: HighWire-hosted journal article supplement (https://jcp.bmjjournals.com/content/suppl/2005/02/24/58.3.249)
Supplement: 583249appendix.pdf [file 583249appendix.pdf]

## Group Membership

- One **Royal College of General Practitioners** representative:

Dr Colin Waine, OBE, FRCP, FRCGP,  
[colin.waine@sunderland.ac.uk](mailto:colin.waine@sunderland.ac.uk).

- Three **PRODIGY** representatives (2 general practitioners and 1 information scientist):

Dr David Finnigan, MBChB MRCGP DCH Dip Ther,  
[davidfinnigan@doctors.net.uk](mailto:davidfinnigan@doctors.net.uk) Dr Sharon Smart, MBBS MRCGP  
DCH DRCOG Dip Ther. [s.r.s.smart@ncl.ac.uk](mailto:s.r.s.smart@ncl.ac.uk), and Mrs Doreen  
Wilson BA(Hons), Dip Med Sci [Doreenwilson@ncl.ac.uk](mailto:Doreenwilson@ncl.ac.uk) Sowerby  
Centre for Health Informatics, Newcastle MCLIP  
New member 2005 Mrs Jennifer Forth BSc [j.o.forth@ncl.ac.uk](mailto:j.o.forth@ncl.ac.uk)

- Four **Association of Clinical Pathologists** representatives:

Prof Tim Reynolds, BSc, MD FRCPPath, Queens Hospital, Burton  
on Trent (Chemical Pathology) [tim.Reynolds@Queens.Burtonh-  
tr.wmids.nhs.uk](mailto:tim.Reynolds@Queens.Burtonh-tr.wmids.nhs.uk)

Dr Marjorie Greig MB ChB, Dip Hlth Mgt, FRCPPath, (Microbiology),  
St Richard's Hospital, Chichester. [marjory.greig@rws-tr.nhs.uk](mailto:marjory.greig@rws-tr.nhs.uk)

Dr David Bareford MD FRCP FRCPPath (Haematology), City  
Hospital Birmingham. [d.bareford@bham.ac.uk](mailto:d.bareford@bham.ac.uk)

Dr Gavin Spickett MA BM BCh DPhil FRCP FRCPPath,  
(Immunology) Royal Victoria Hospital, Newcastle  
[gavin.spickett@nuth.northy.nhs.uk](mailto:gavin.spickett@nuth.northy.nhs.uk)

- Two **Royal College of Pathologists** representatives:

Prof Tim Reynolds,  
Dr Graham Beastall BSc PhD, FRCP  
[gbeastall@gri-biochem.org.uk](mailto:gbeastall@gri-biochem.org.uk)

- One **Association of Clinical Biochemists** representative:

Dr Danielle Freedman MB BS FRCPPath, Luton & Dunstable  
Hospital NHS Trust. [Danielle.freedman@ldh-tr.anglox.nhs.uk](mailto:Danielle.freedman@ldh-tr.anglox.nhs.uk)

- One **Association of Medical Microbiologists** representative:

Dr Judith Richards, MB Bs FRCPATH Dip Med Ed. Norfolk & Norwich University Hospital, [judith.richards@nnuh.nhs.uk](mailto:judith.richards@nnuh.nhs.uk)

•One **British Society for Haematology** representative (held jointly):

Dr Michael Galloway, BSc MBA MD FRCP FRCPATH, Sunderland Acute NHS trust. [mike.galloway@chs.northy.nhs.uk](mailto:mike.galloway@chs.northy.nhs.uk).

Dr David Bareford

•One **Health Protection Agency** representative:

Dr Clodna McNulty, MBBS FRCPATH Gloucester PHLS. [cmcnulty@phls.org.uk](mailto:cmcnulty@phls.org.uk)

•One **National Patient** representative:

Mr John Marriott, Vice-Chairman of the Lay Committee of the Royal College of Pathologists. [jmarriott1@waitrose.com](mailto:jmarriott1@waitrose.com)

#### **Chairman/Editor**

Dr Stuart Smellie, MA DM MRCP FRCPATH (Clinical Biochemistry), Bishop Auckland Hospital, County Durham and Darlington NHS trust. [stuart.smellie@cddah.nhs.uk](mailto:stuart.smellie@cddah.nhs.uk)
